# Supplementary figures and images for: Rhabdo-immunodeficiency virus, a murine model of acute HIV-1 infection
Source: eLife journal article supplement (doi:10.7554/elife.49875), 2019-10-23

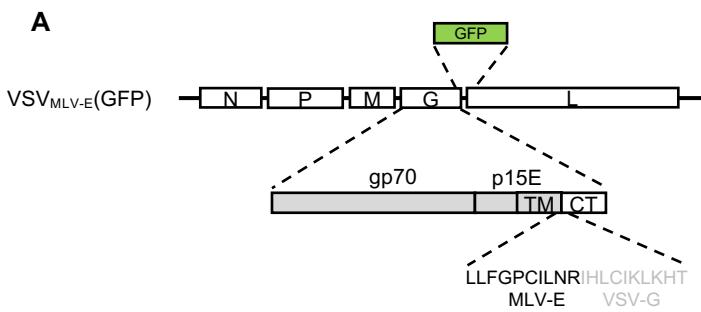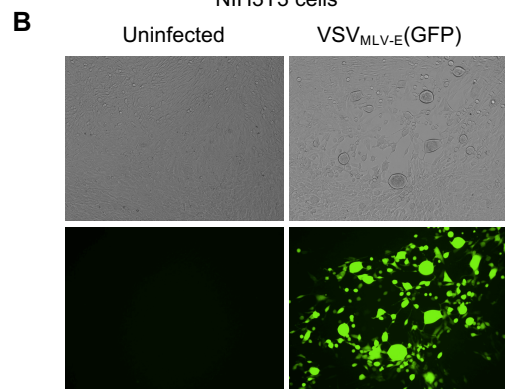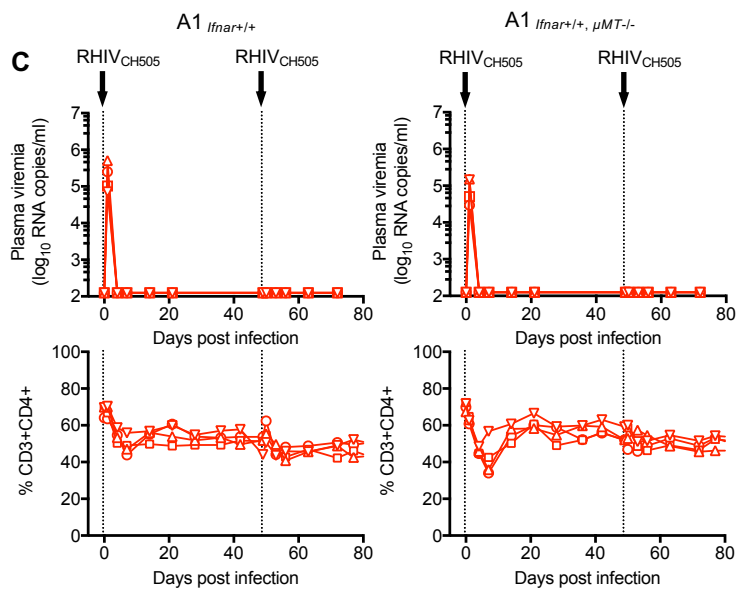

Supplement: supp [file elife-49875-supp-v1.zip]

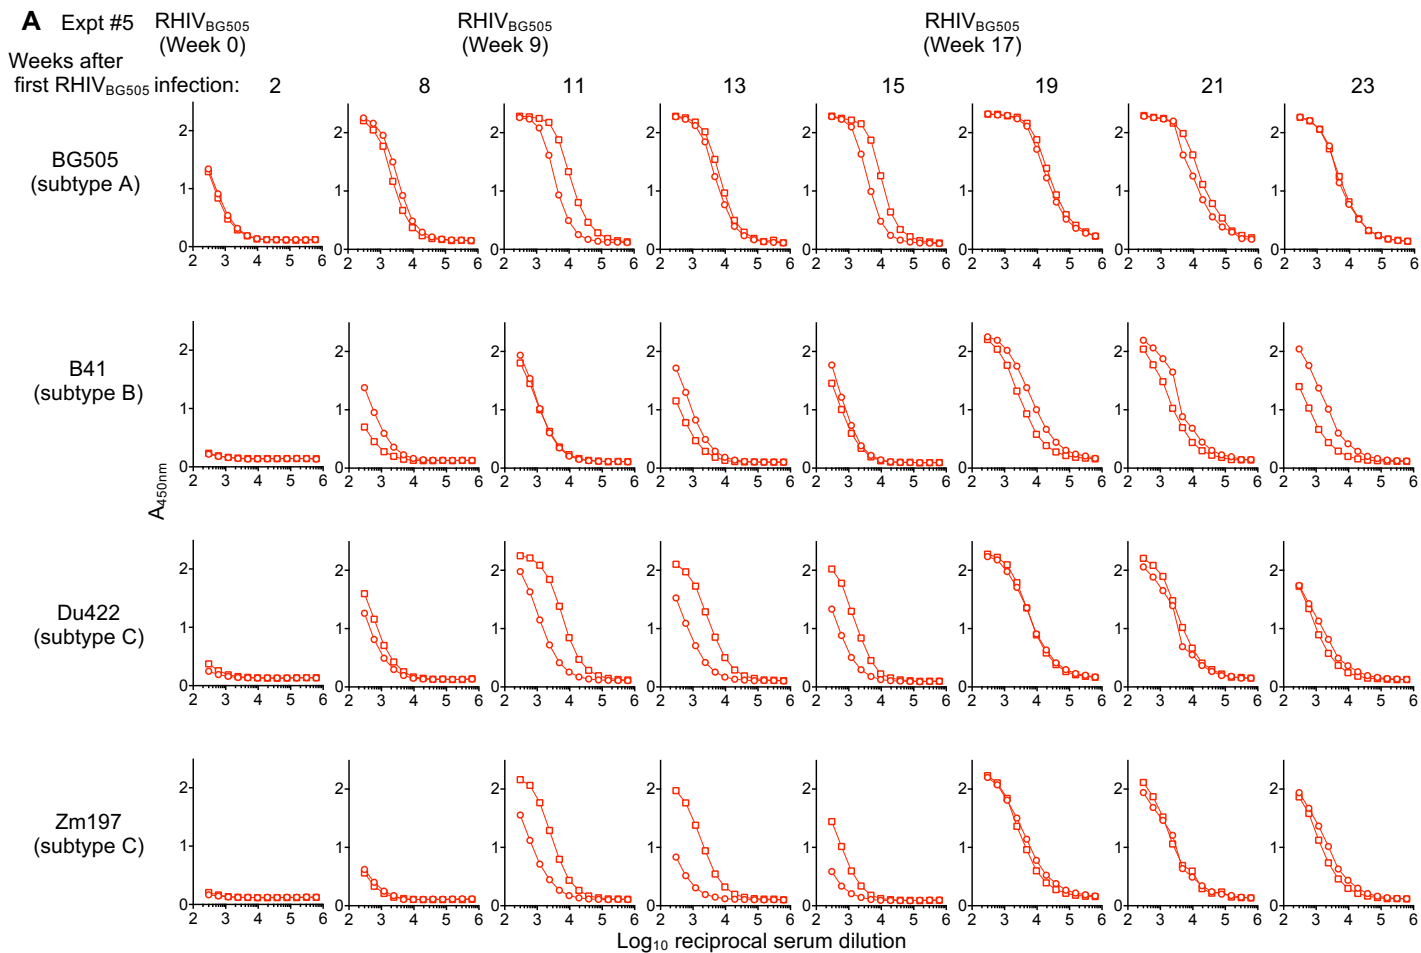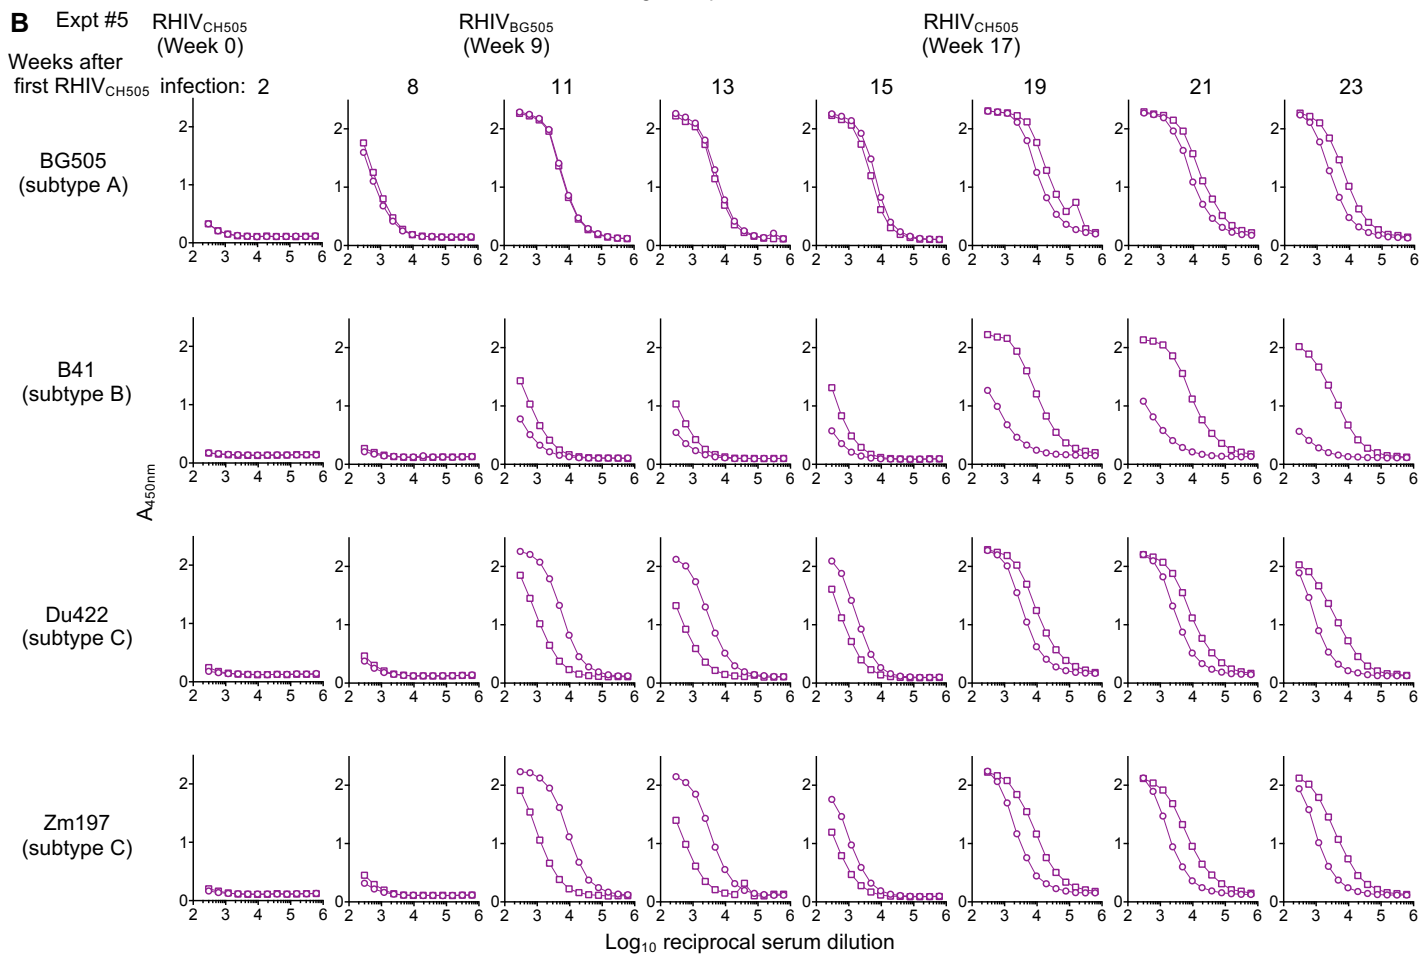

Supplement: supp [file elife-49875-supp-v1.zip]

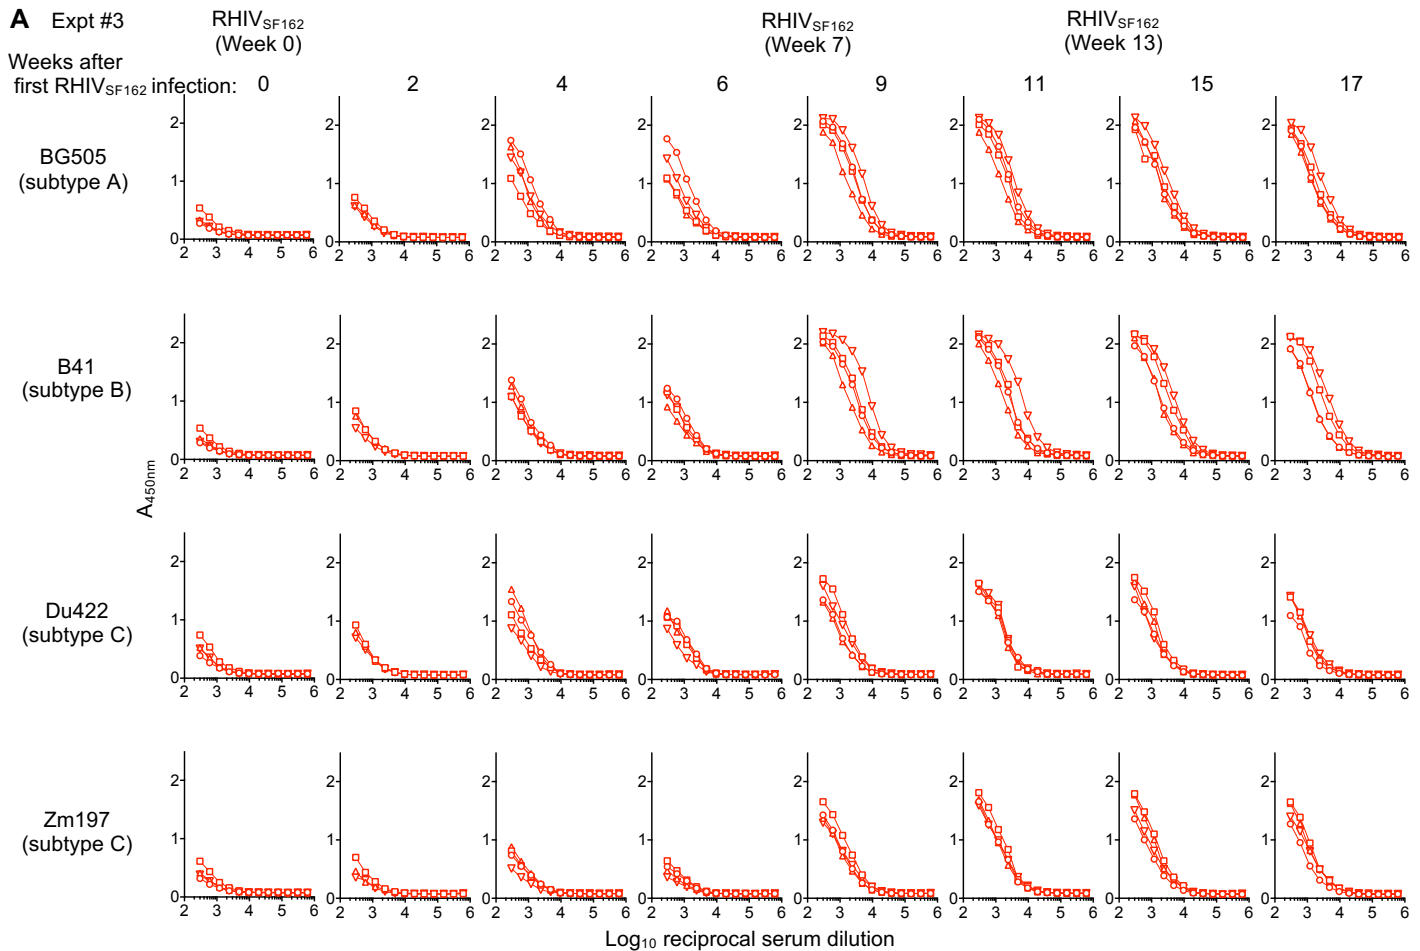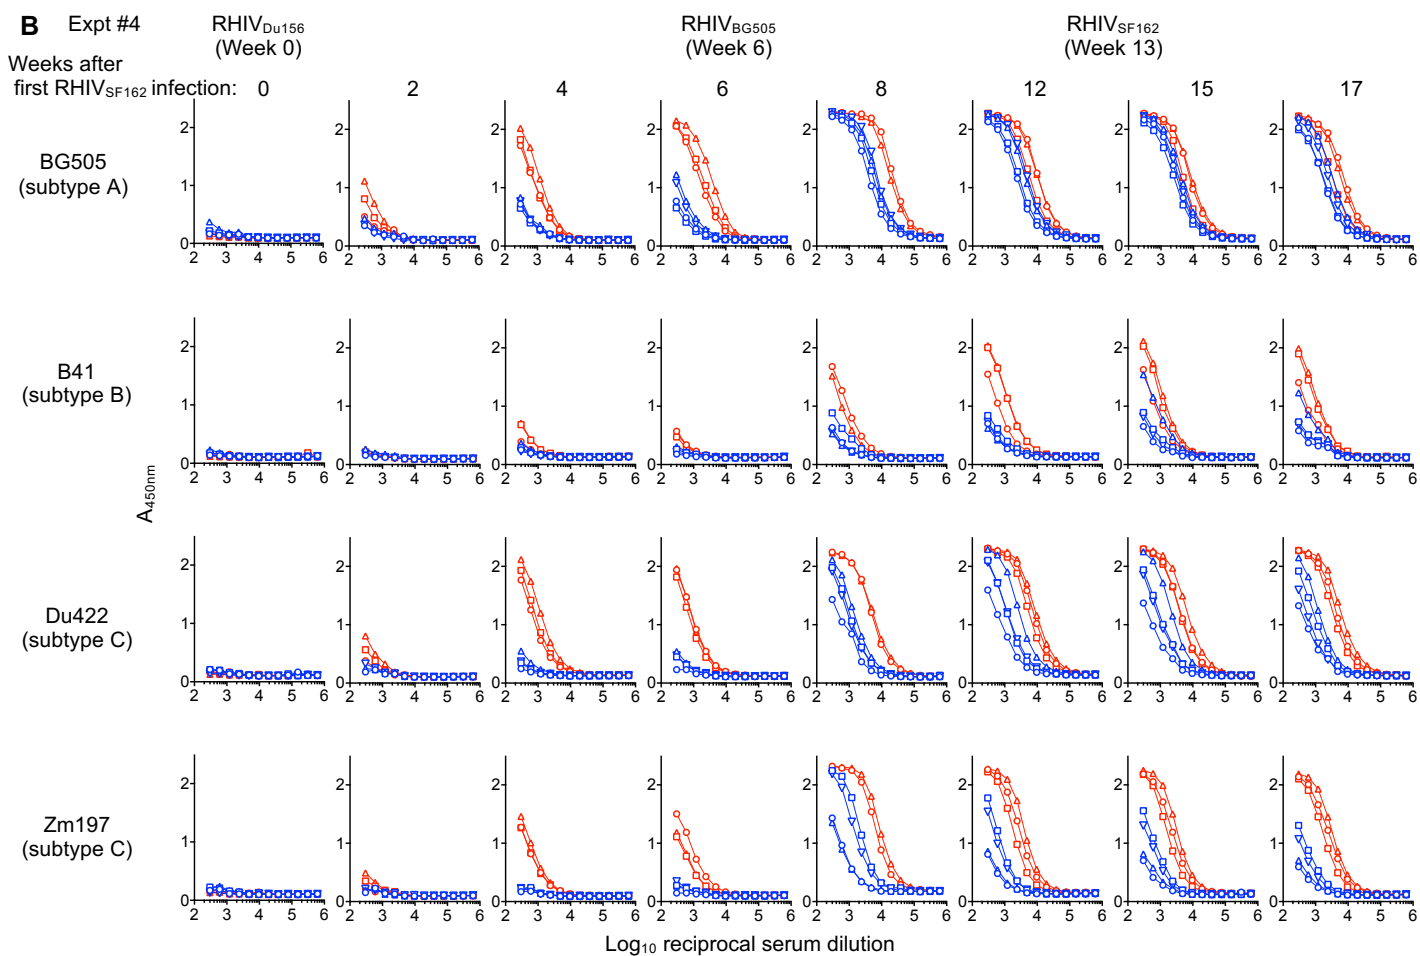

Supplement: supp [file elife-49875-supp-v1.zip]

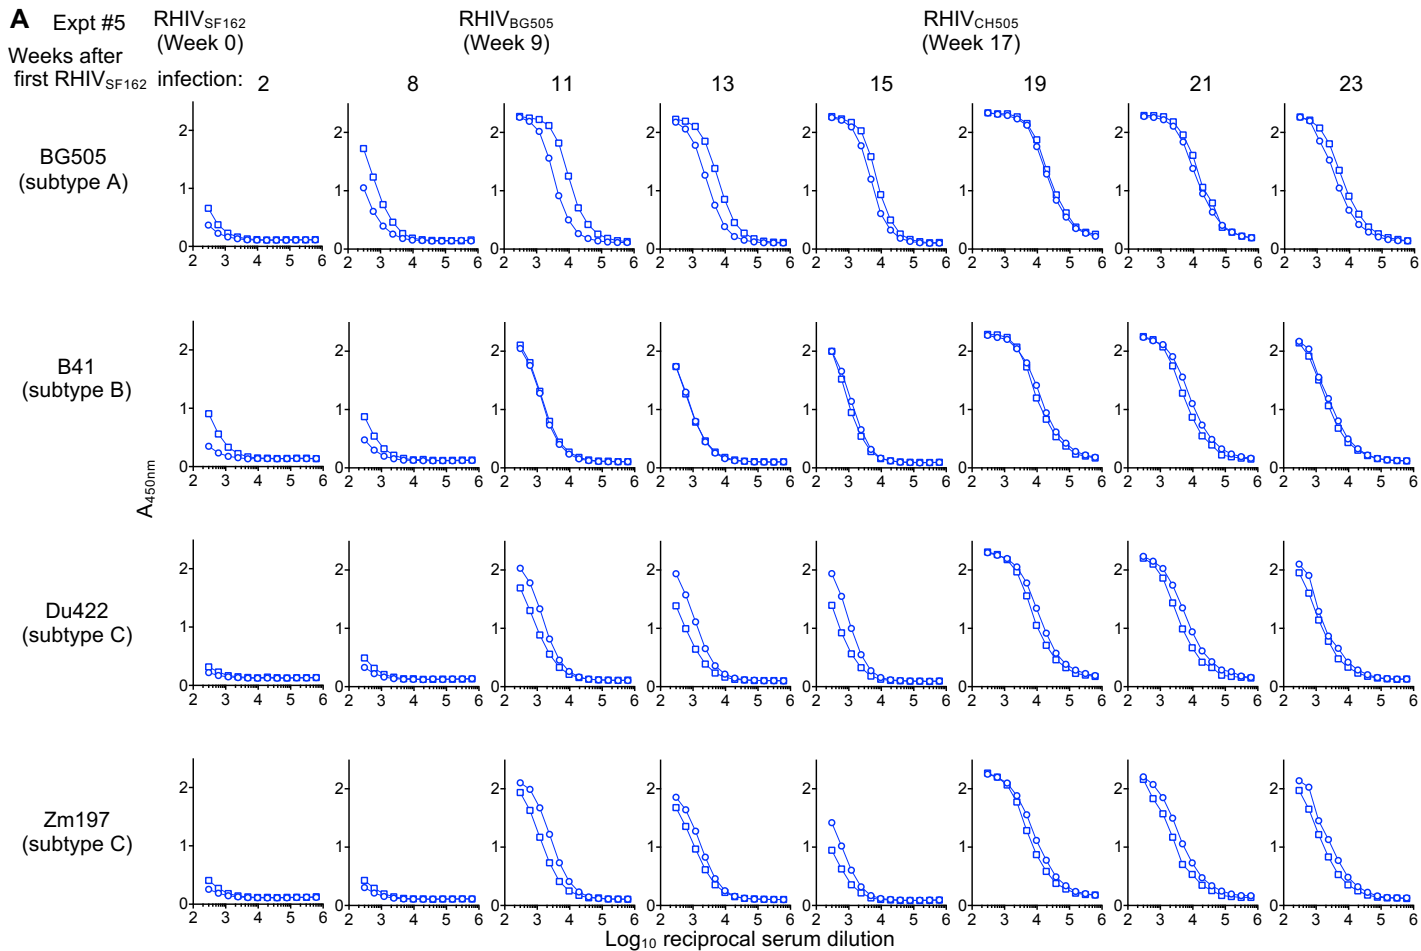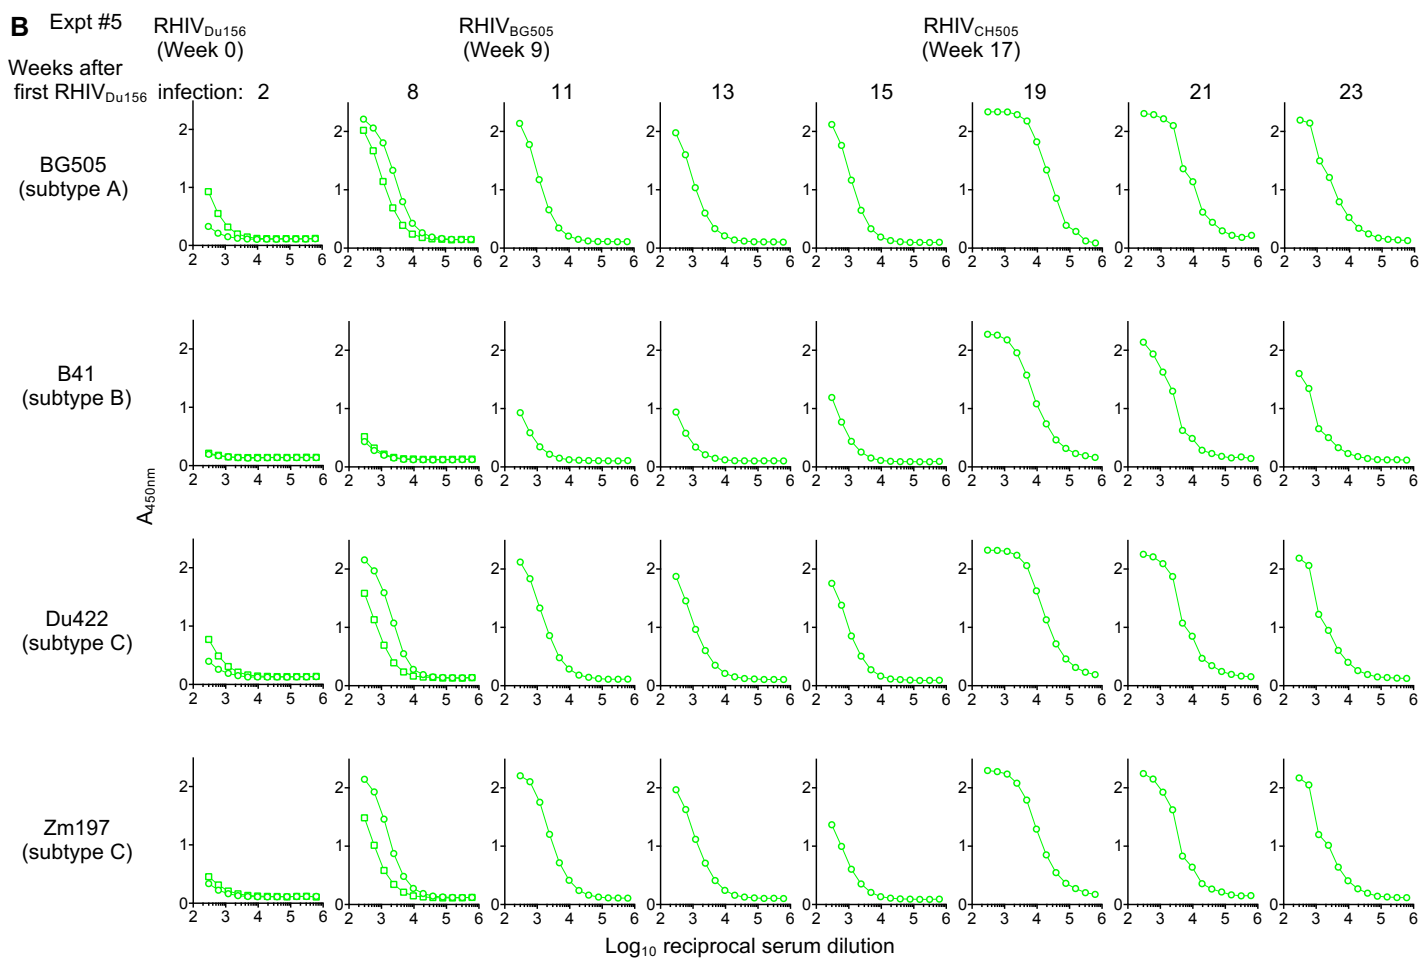

Supplement: supp [file elife-49875-supp-v1.zip]

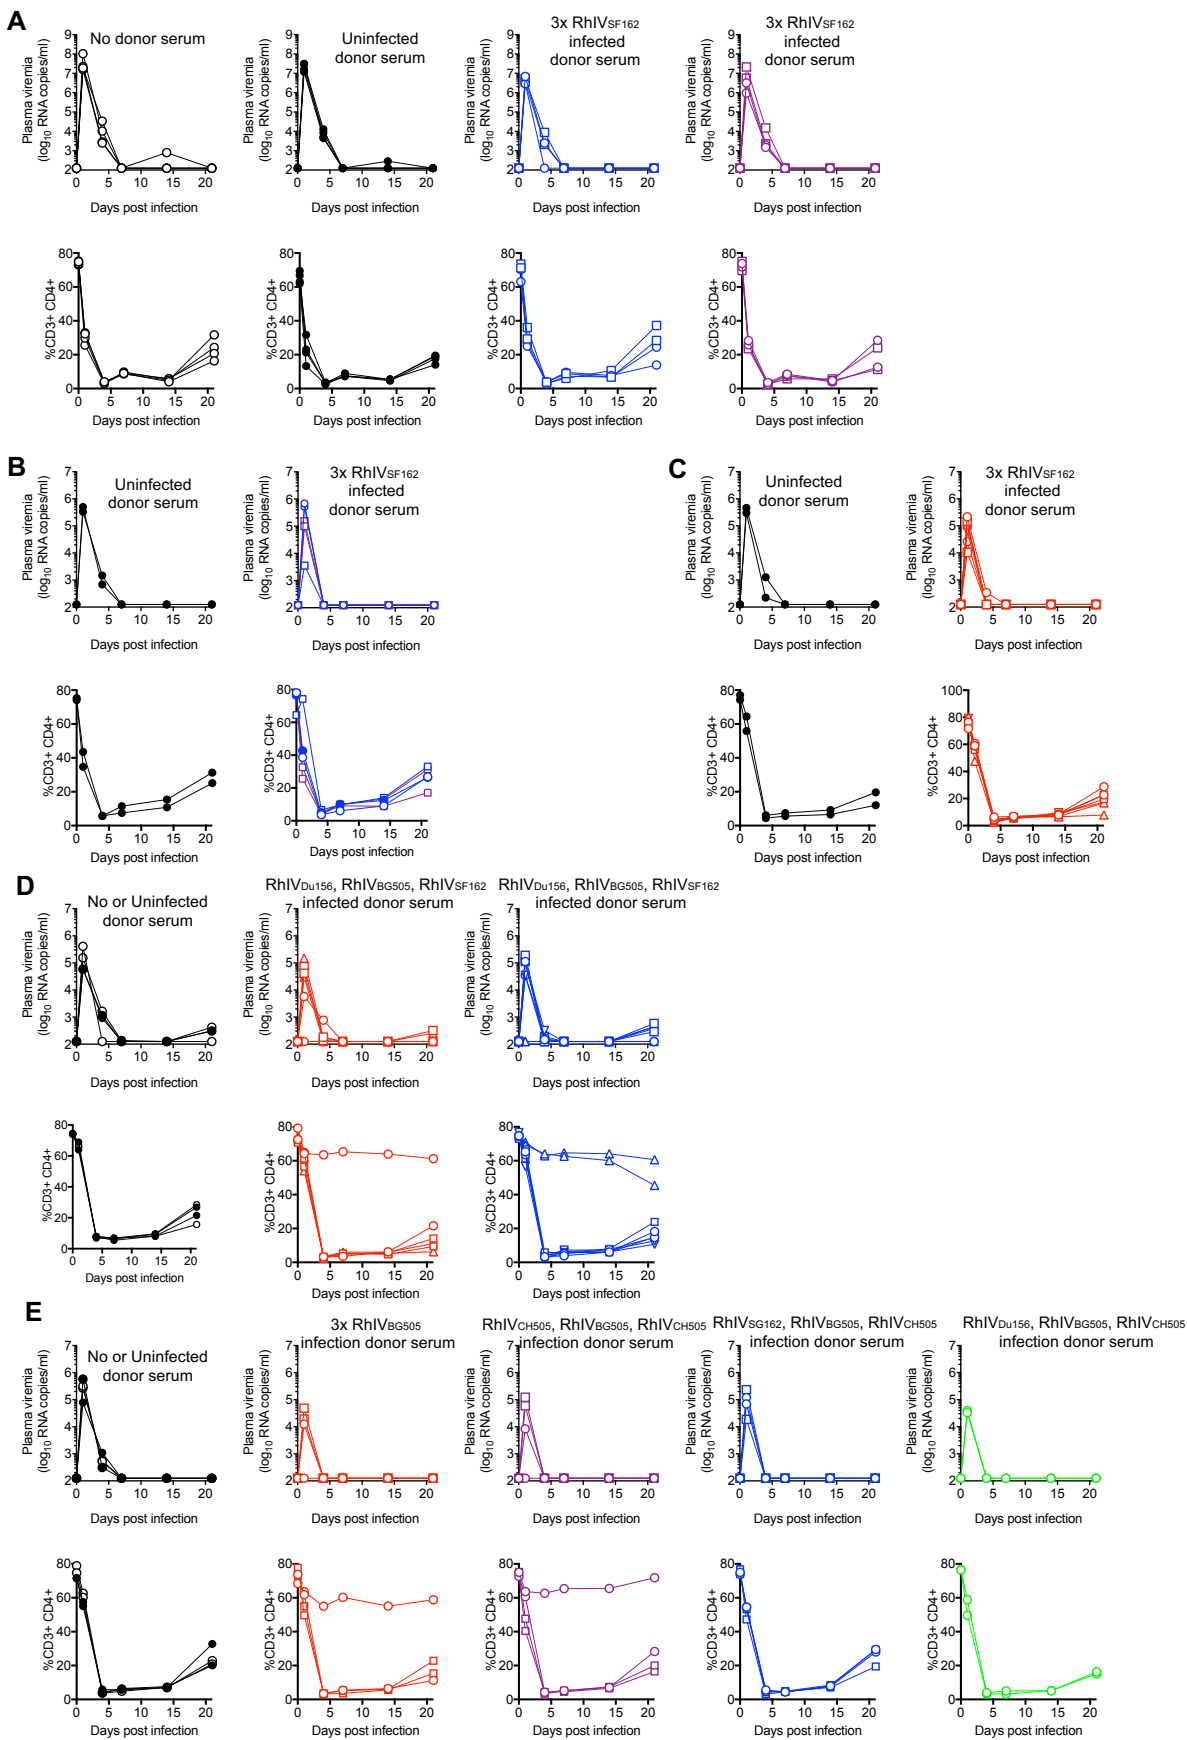

Supplement: supp [file elife-49875-supp-v1.zip]

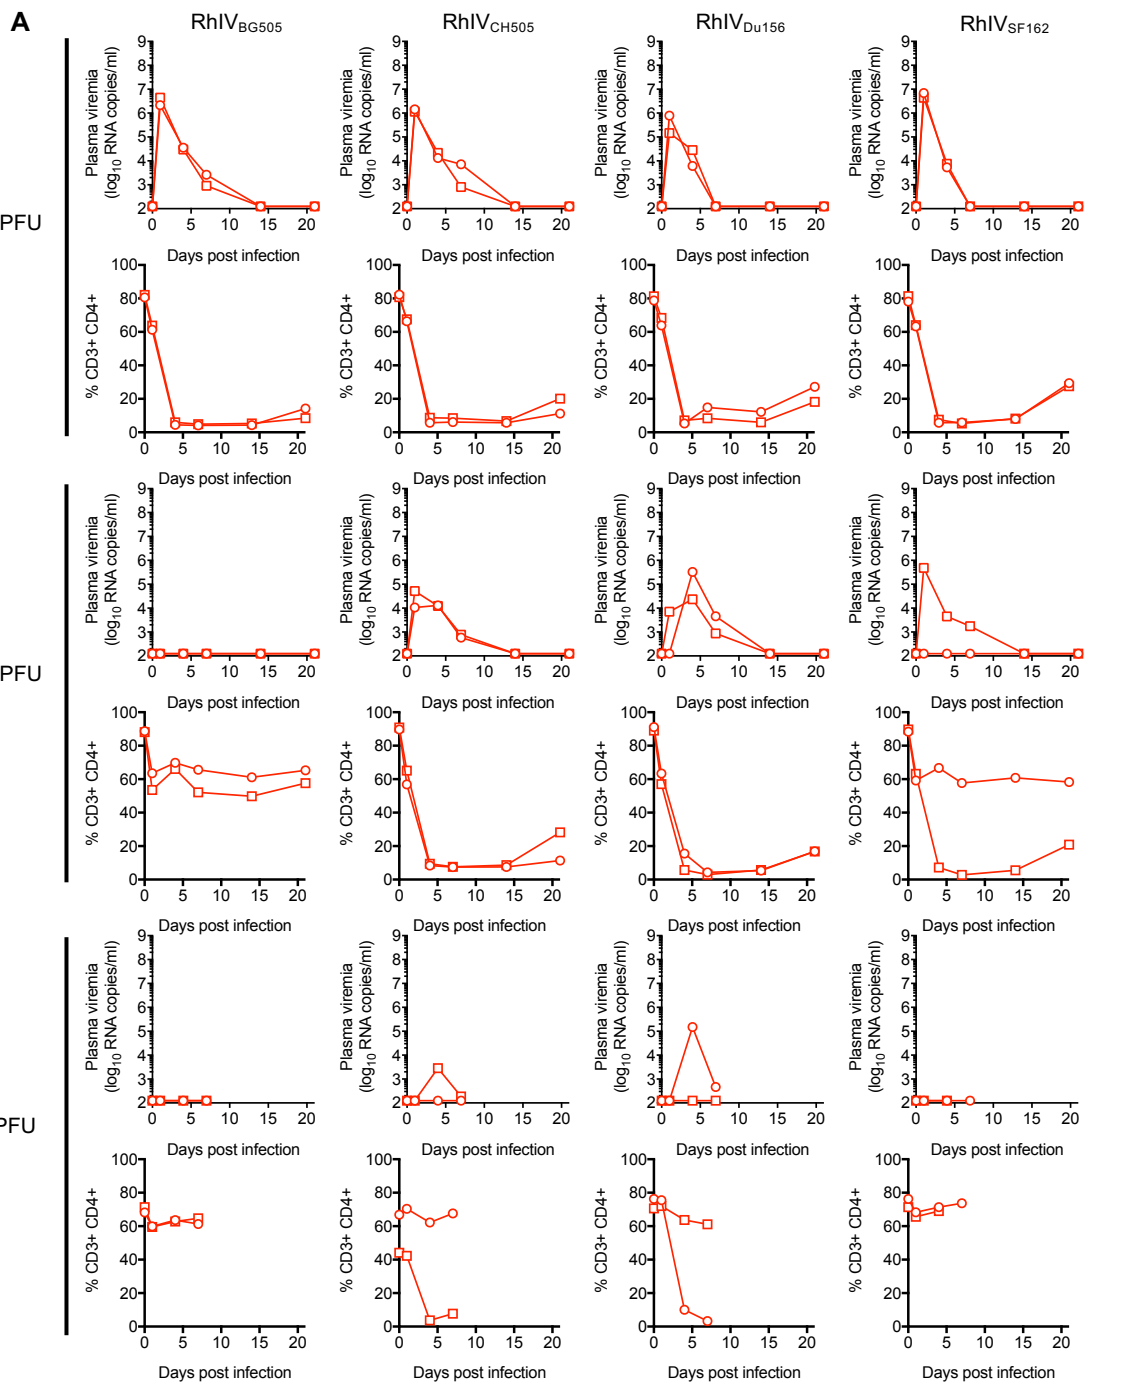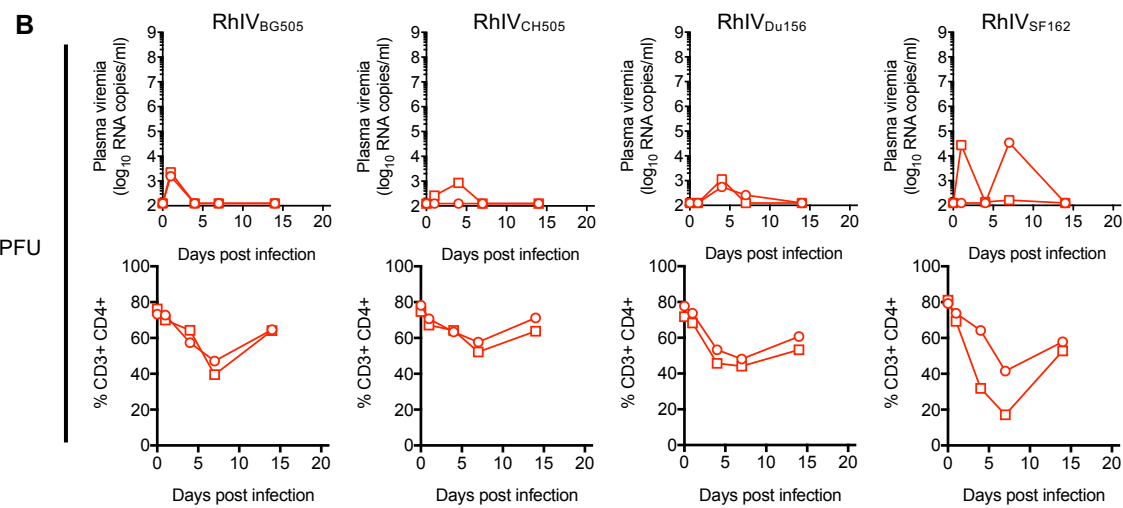

Supplement: supp [file elife-49875-supp-v1.zip]

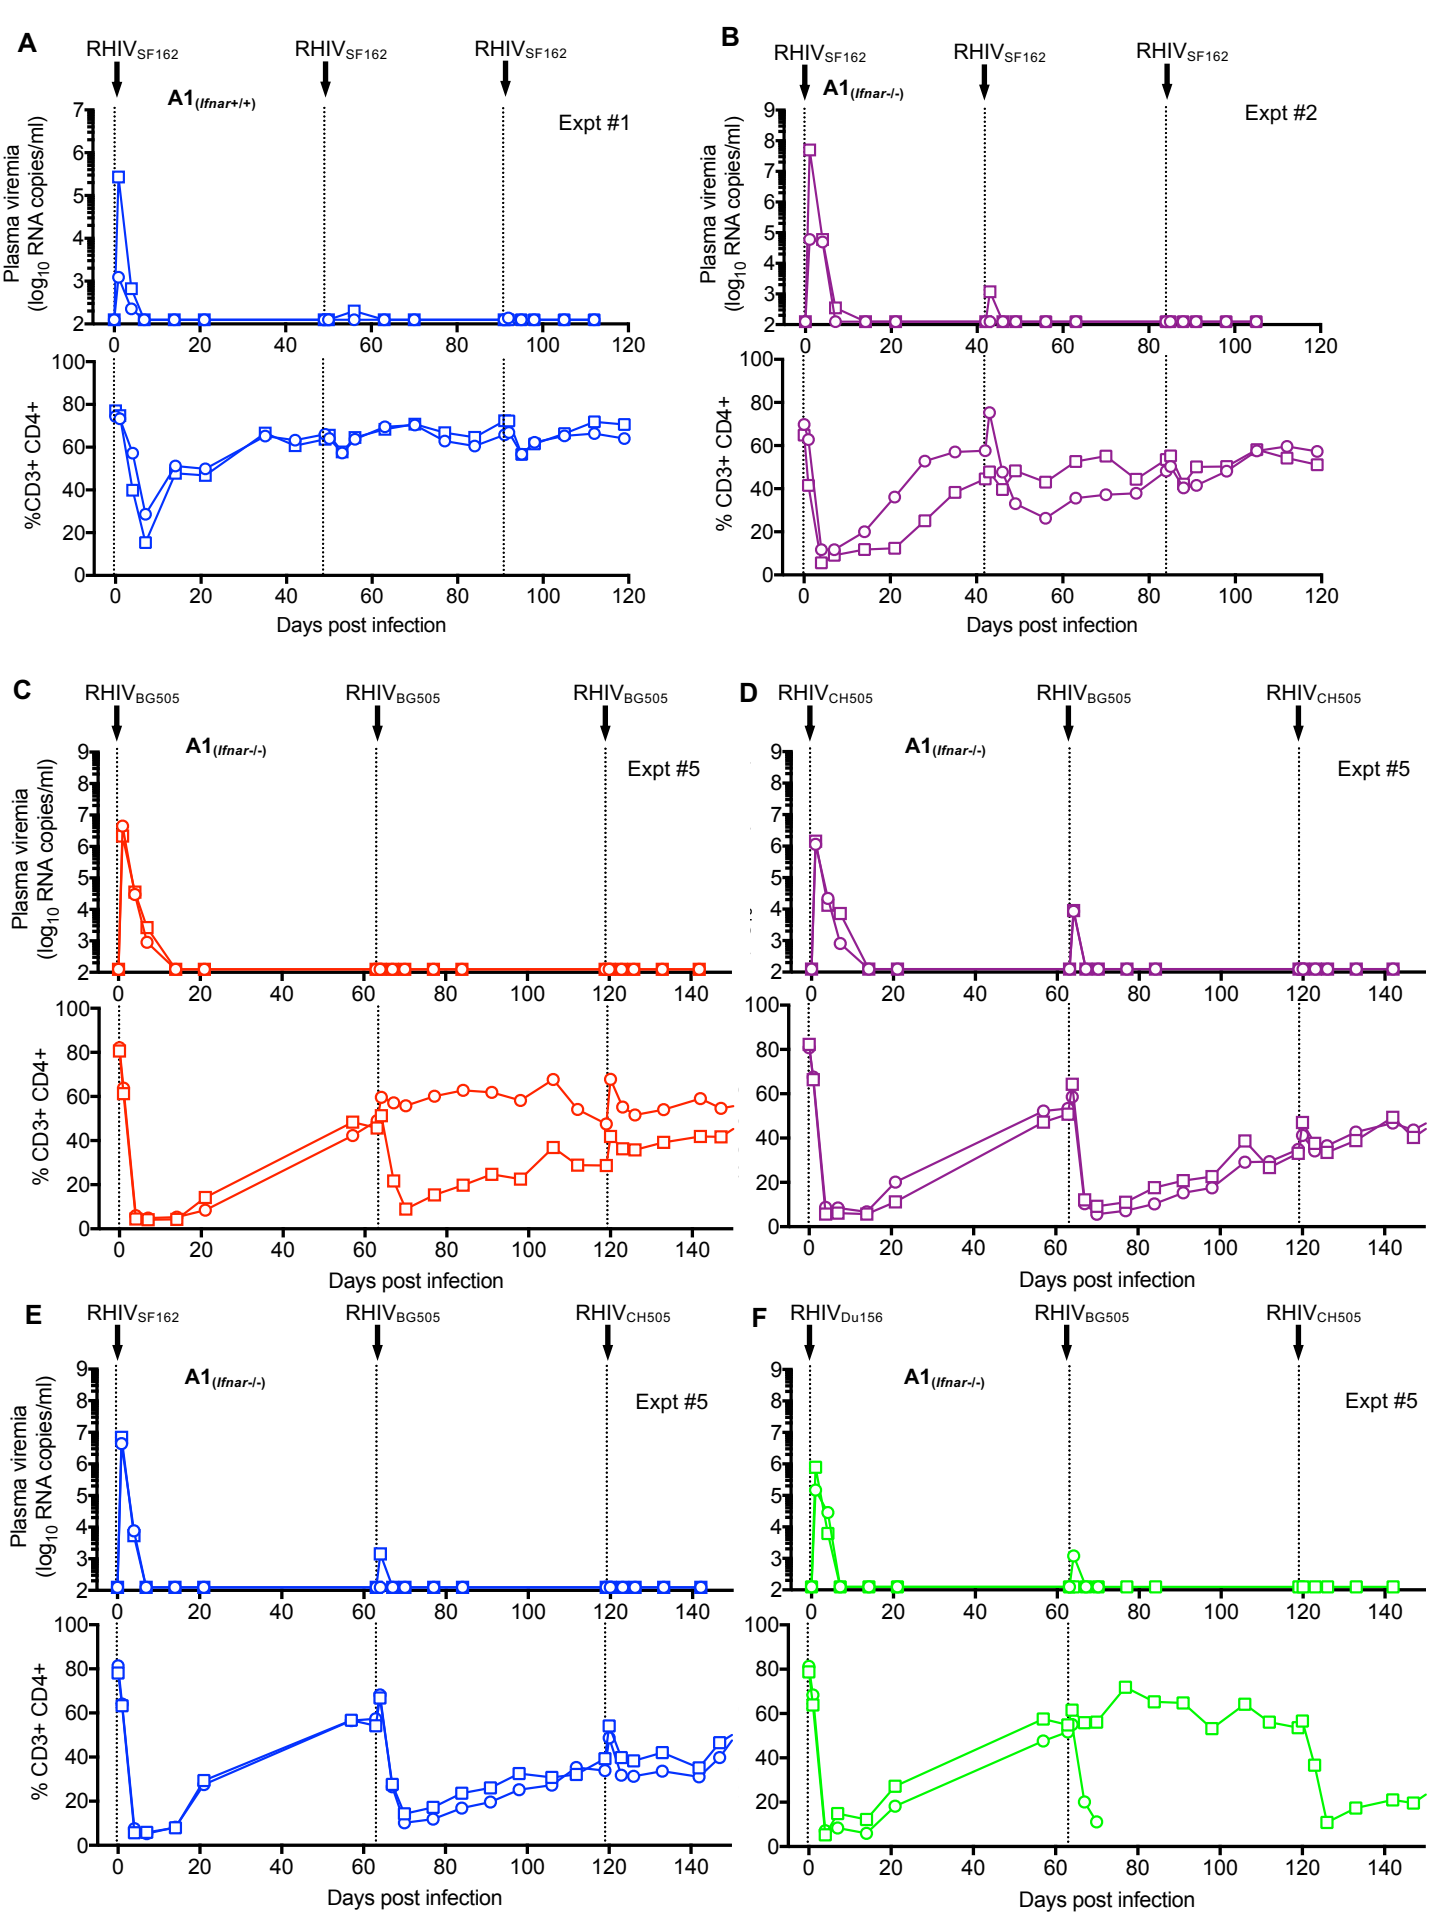

Supplement: supp [file elife-49875-supp-v1.zip]

**A**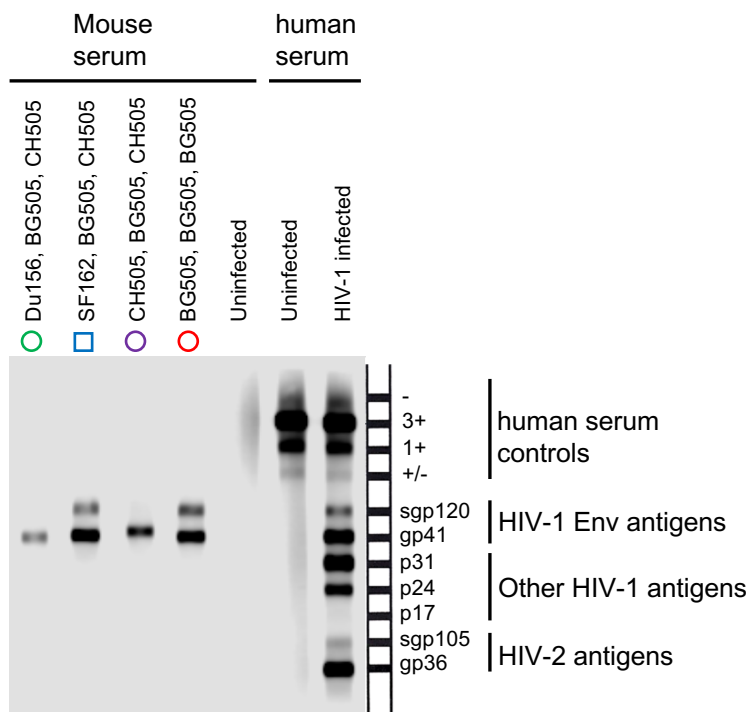**B**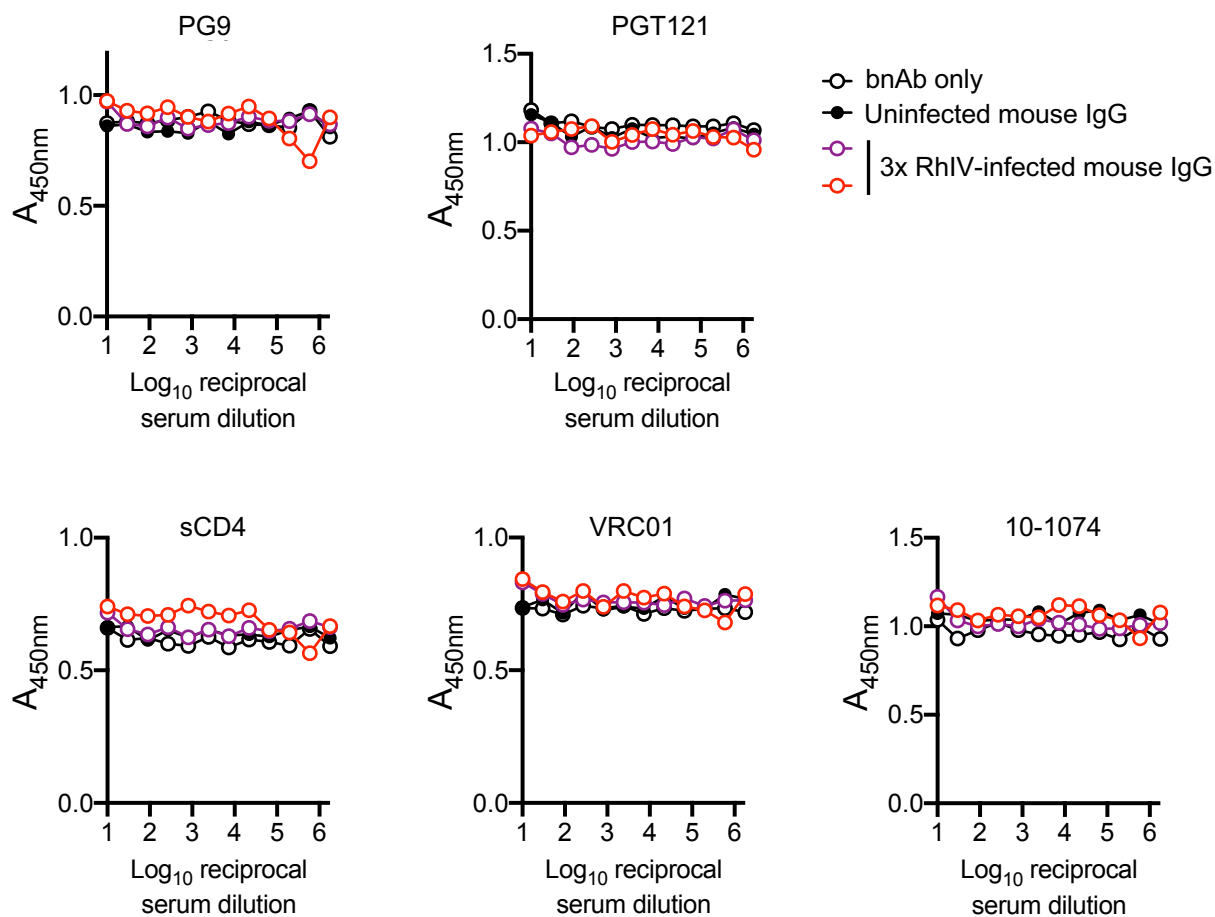

Supplement: supp [file elife-49875-supp-v1.zip]
